# Supplementary material
Source: Springer Nature journal article supplement (https://www.springermedizin.de/resource/supplementary/12884_2013_878_MOESM3_ESM.pdf/9458386)
Supplement: MOESM3 [file 9458386]

## INITIATIVES

1. Discover, develop and introduce new or adapted technologies, tools, and treatments
2. Shape demand and improve health practices
3. Enhance frontline worker capabilities and performance
4. Advocate for conducive policy and programme environment

## INNOVATIONS

Maternal & newborn healthcare delivered in a new way

## ENHANCED INTERACTIONS

between families and frontline workers

## INCREASED COVERAGE

of critical interventions (practices that save lives)

## HEALTH OUTCOME

Improved maternal & newborn survival

## SCALE UP

adoption of innovations beyond grantees' areas
